# Supplementary material
Source: PubMed Central journal article supplement (PMC3174581)
Supplement: 1102445108_pnas.201102445SI.pdf [file 1102445108_pnas.201102445SI.pdf]

# Supporting Information

Buckee et al. 10.1073/pnas.1102445108

## SI Text

**Exploring an Increased Number of Alleles at Antigenic Loci.** For both the stochastic and deterministic models, we explored the effects of increasing the numbers of alleles at each locus. Fig. S3 illustrates the final dimensions of strain space from stochastic and deterministic versions of models in which one antigen has 10 alleles and the other has 25. The same dynamics are observed as in the lower dimensional systems, with the stochastic extinction of alleles at the most diverse locus reducing the complexity of antigen space in the stochastic model and the highly structured maintenance of allelic diversity in the deterministic model. Fig. S4 illustrates a range of equilibrium outcomes for the deterministic model when considering different combinations of diversities among the antigens.

**Increasing Population Size Affects the Time to Equilibrium but Not Model Outcomes.** To determine how population size might affect the stochastic model outcomes, we explored 2,000 simulations with population sizes varying between 500 and 1,500 hosts, keeping all other parameters the same ( $C = 12$ ,  $1/\mu = 7$ ,  $1/\zeta = 29$ ,  $\beta = 0.5$ ,  $R = 0.05$ ,  $\tau = 0.025$ ,  $\gamma = 3.8$ ). We found that although there was a nonsignificant increase in the time taken to reach equilibrium, the overall outcome was not affected by population size (within this range). Fig. S6 shows how the mean discordance for simulations varied with increasing population size, showing a slight but nonsignificant decrease with population size. Although running much larger simulations was beyond the scope of this work, we believe that greatly increased population sizes may show variable dynamics and reach equilibrium more slowly. In real pathogen populations, therefore, we expect nonoverlapping structure to be most pronounced in small populations, where competition and herd immunity are most intense.

**Effects of Host Contact Network Structure on Strain Structure.** Lastly, we explored how the underlying host contact structure might affect the stochastic model by running 5,000 simulations varying the contacts among hosts using the small-world networks developed by Watts and Strogatz (1) and modified for this type of system earlier (2). Here, the parameter  $\rho$  corresponds to the probability that an individual's contacts are random in the population as opposed to local; hence,  $\rho = 0$  is an entirely locally mixing population and  $\rho = 1$  is an entirely randomly mixed population. Fig. S5 illustrates the effects of changing  $\rho$  from local to random (with a small-world structure between) on the strain structure of the pathogen. This figure was generated from 5,000 simulations run with strong cross-immunity and the same parameter values in each simulation, with 10 alleles at one locus and 25 at the other, with only host contact structure changing [here, parameters are as follows:  $C = 12$ ,  $1/\mu = 7$ ,  $1/\zeta = 29$ ,  $\beta = 0.5$ ,  $R = 0.05$ ,  $\tau = 0.025$ ,  $\gamma = 3.8$ , host population size ( $P$ ) = 1,500]. As  $\rho$  increases, the mean discordance of the pathogen population increased rapidly and then remained relatively constant, and the time to reach this  $f^*$  value decreased. Thus, the pathogen population took a longer time to equilibrate with localized host contacts, and the pathogen population was more overlapping than would be expected in the random mixing case. Note that, as seen in our previous studies, even a relatively low  $\rho$  resulted in a strong nonoverlapping structure (about 0.2 in these simulations). The rise in nonoverlapping structure appears to be delayed in this system, however, compared with our previous study (occurring when  $\rho$  is greater than 0.1). This suggests that the asymmetrical diversities of antigenic loci here do hinder the emergence of discrete strains when hosts mix very locally.

1. Watts DJ, Strogatz SH (1998) Collective dynamics of 'small-world' networks. *Nature* 393:440–442.

2. Buckee CO, Koelle K, Mustard MJ, Gupta S (2004) The effects of host contact network structure on pathogen diversity and strain structure. *Proc Natl Acad Sci USA* 101: 10839–10844.
